# Supplementary material for: Molecular characterization of high-risk human papillomavirus (HR-HPV) in women in Lomé, Togo
Source: Springer Nature journal article supplement (doi:10.1186/s12879-021-05956-5), 2021-03-19
Supplement: MOESM1 [file 18984594]

Individual data collection form for the study « Molecular characterization of high-risk human Papillomavirus in women in Lomé (TOGO) »

Date / / / /

1- Surname and First name (s) .....

2- Age : .....

3-Occupation: Housewife /\_/ Student /\_/ Salaried /\_/ Retired /\_/ Unemployed /\_/

4- Address: Phone ..... District ..... ..

5- Education : Illiterate /\_/ Primary /\_/ Secondary /\_/ University /\_/

6- Marital status: Single /\_/ Married /\_/ Divorced /\_/ Widow /\_/

7- When did you have your last period?: / / / /

8- At what age did you have your first sexual intercourse? ..... (year)

9- Number of pregnancies :..... Living children.....; Miscarriage .....

10- Number of sexual partners:.....

11- Do you use a condom during sex? Each time/\_/ Never /\_/ Sometimes /\_/ Rarely /\_/

12- Do you use oral contraceptives? Yes /\_/ No /\_/

13- Frequency of intercourse : 1 per week /\_/ 1 per month /\_/

14- How many times do you go for a gynecological visit per year ?.....

15- What is the reason for your current visit?

.....

16- Have you ever been screened for cervical cancer ? Yes /\_/ No /\_/ If yes, how many times ? : .....

17- What do you think is the cause of cervical cancer ? .....

18- Have you ever had a vaginal swab ? Yes /\_/ No /\_/

19- Have you ever had surgery on your cervix or uterus. Yes /\_/ No /\_/ If yes, specify the type.....

20- Have you ever had a gynecological infection ? Yes /\_/ No /\_/

What kind of infection ? .....

Thank you for your participation!

This page is for medical staff only

1-Visual screening results

- Result one minute after application of acetic acid (VIA)

Negatif /\_/

Positif /\_/

- Result after application of lugol solution (VIL)

Negatif /\_/

Positif /\_/

2-Based on the result of the VIA / VIL, what did you suggest to the participant?

Circle the number corresponding to the proposed solution

- a. Follow-up advised every ..... Years (fill in the dotted lines with the number of years)
- b. Referral to immediate treatment
- c. Referral to colposcopy and future treatment
- d. Others

(Specify):.....

3- HR-HPV real-time PCR result

Negatif /\_/

Positif /\_/

|                   |  |
|-------------------|--|
| HR- HPV Genotypes |  |
|-------------------|--|

Date :...../..... /.....
